# Supplementary figures and images for: Myocardial Injury Portends a Higher Risk of Mortality and Long-Term Cardiovascular Sequelae after Hospital Discharge in COVID-19 Survivors
Source: MDPI journal article supplement (doi:10.3390/jcm11195964), 2022-10-10

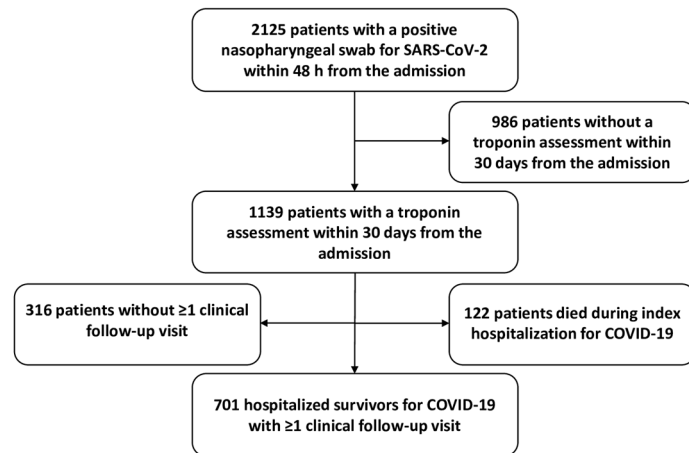

Supplement: s1 [file s1]
